# Supplementary material for: CD137 and PD-L1 targeting with immunovirotherapy induces a potent and durable antitumor immune response in glioblastoma models
Source: HighWire-hosted journal article supplement (doi:10.1136/jitc-2021-002644), 2021-07-01

**Supplementary Figure 4**

**A**

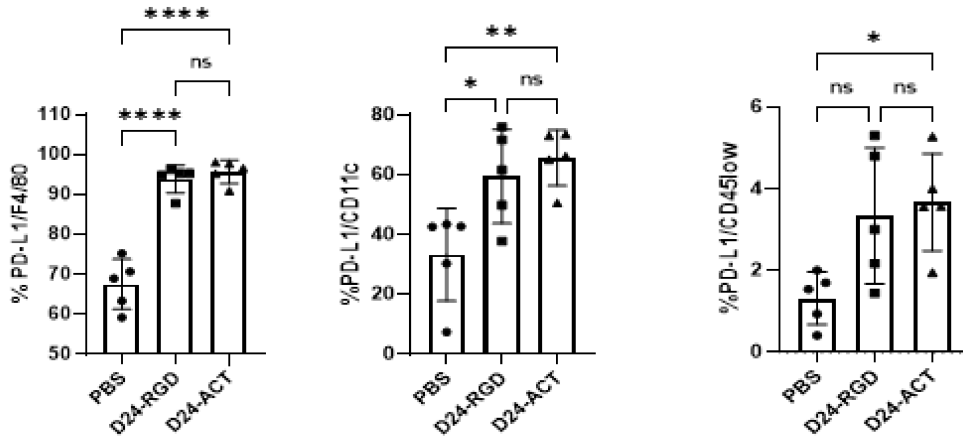

**B**

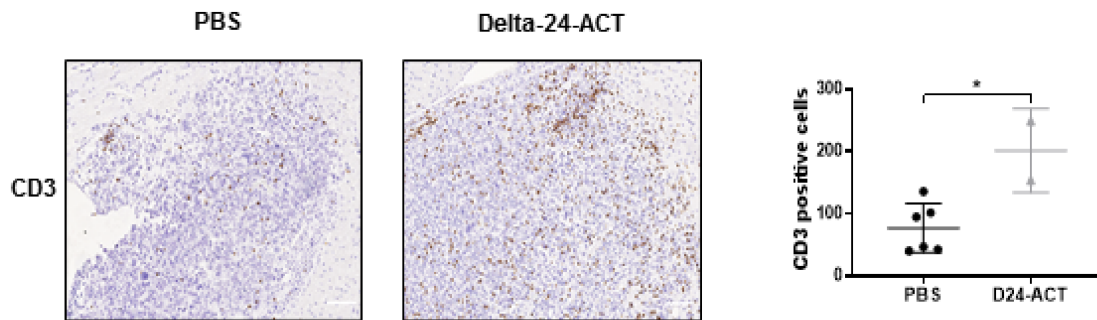

**C**

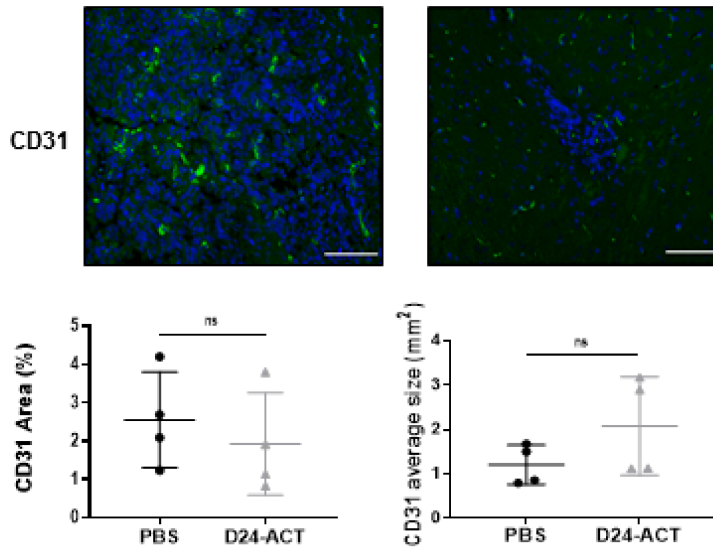

Supplement: jitc-2021-002644supp005_data_supplement.pdf [file jitc-2021-002644supp005_data_supplement.pdf]
