# Supplementary figures and images for: CD137 and PD-L1 targeting with immunovirotherapy induces a potent and durable antitumor immune response in glioblastoma models
Source: HighWire-hosted journal article supplement (doi:10.1136/jitc-2021-002644), 2021-07-01

## Supplementary Figure 2

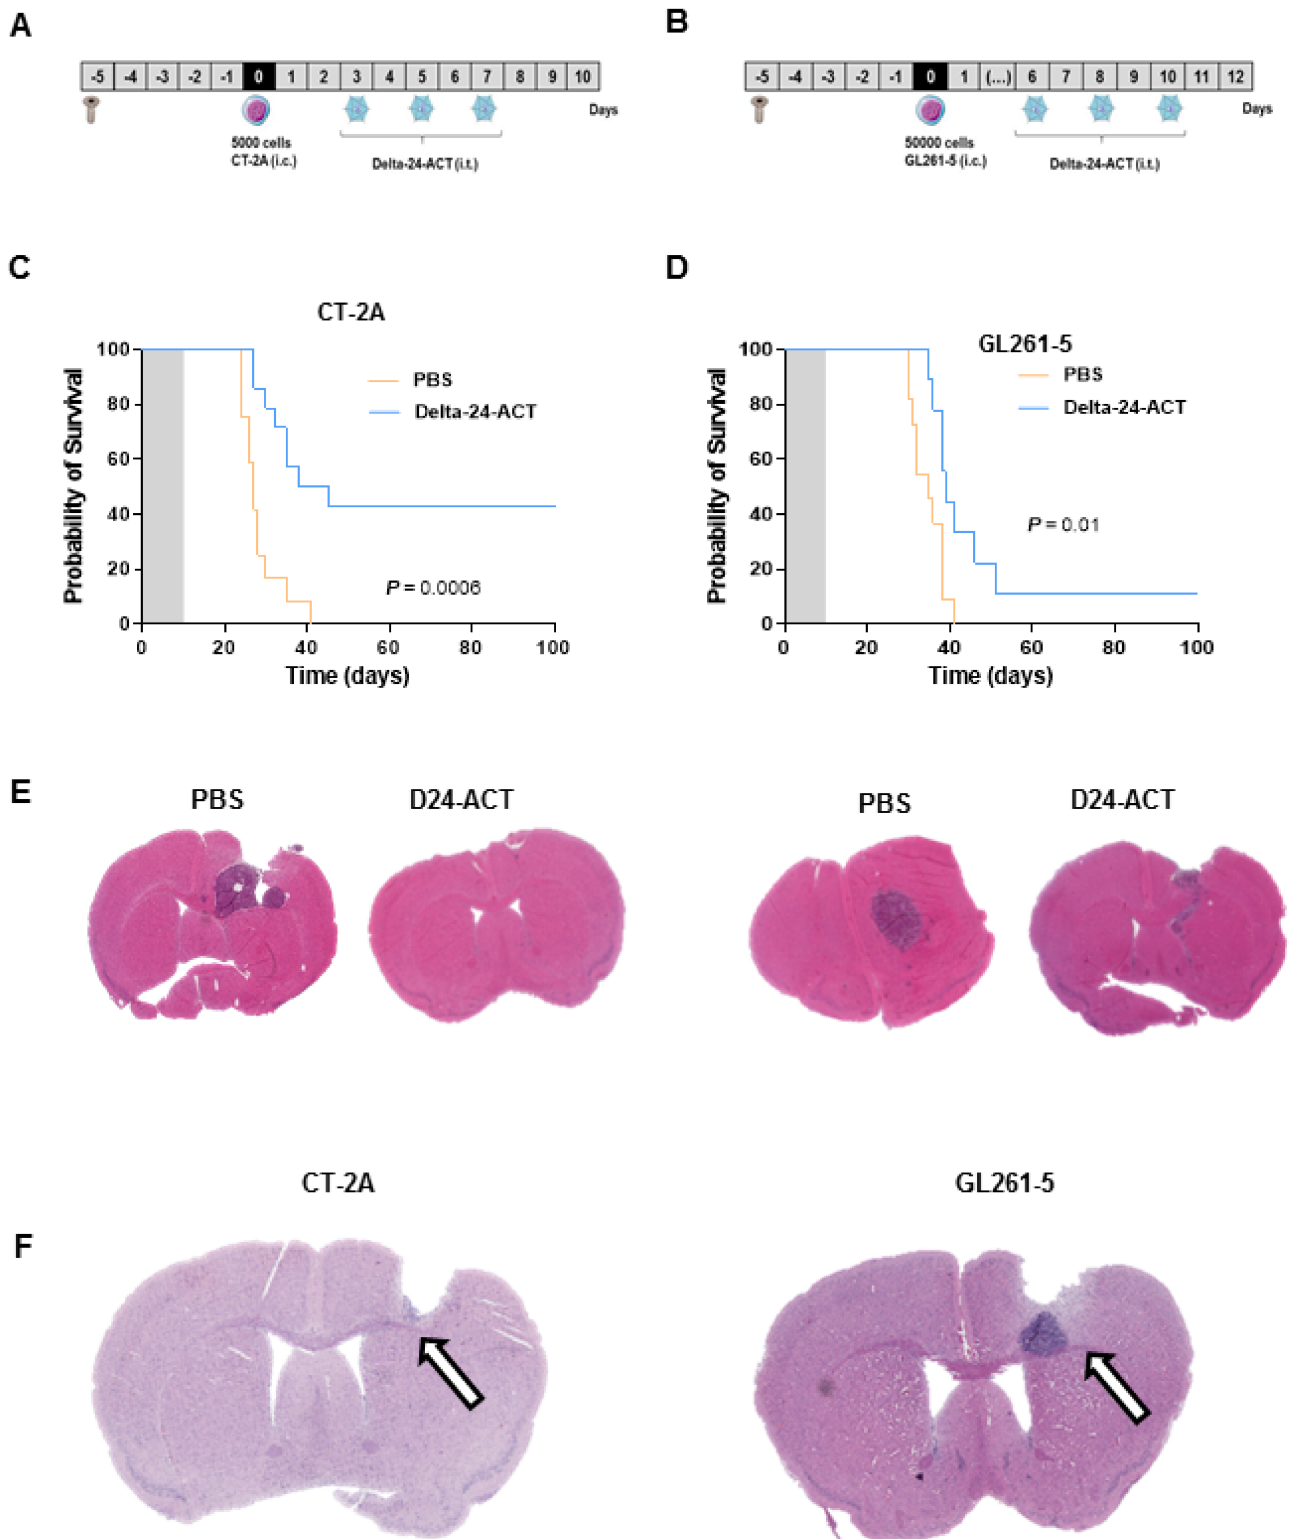

Supplement: jitc-2021-002644supp003_data_supplement.pdf [file jitc-2021-002644supp003_data_supplement.pdf]

## Supplementary Figure 3

A

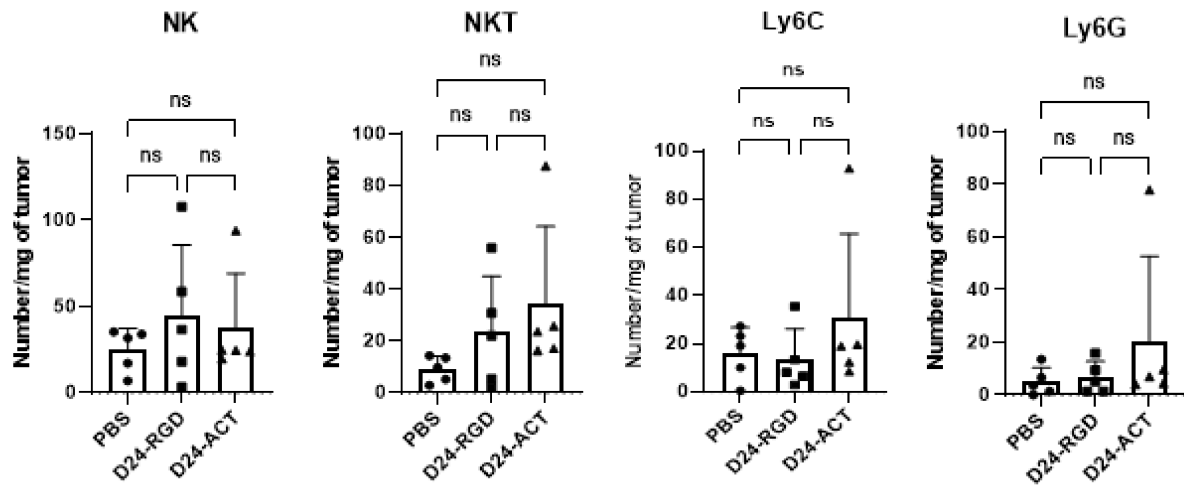

B

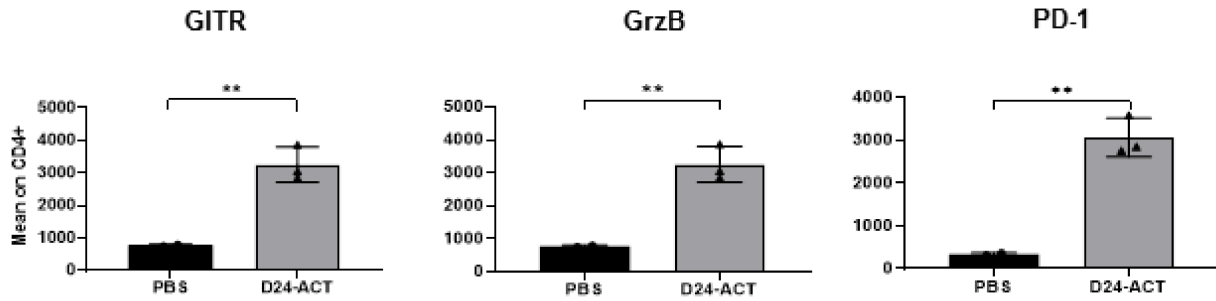

C

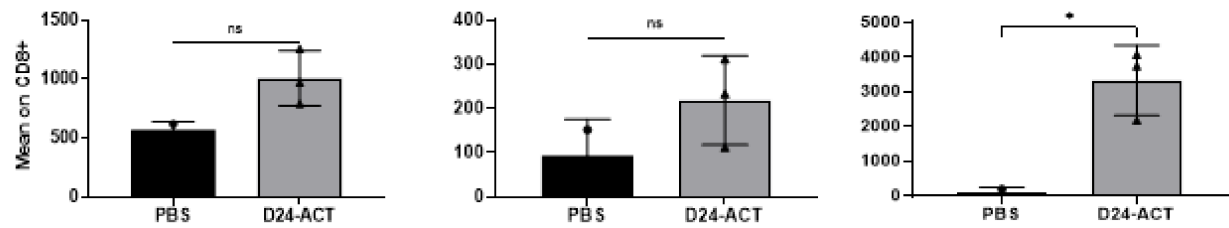

Supplement: jitc-2021-002644supp004_data_supplement.pdf [file jitc-2021-002644supp004_data_supplement.pdf]

**Supplementary Figure 4**

**A**

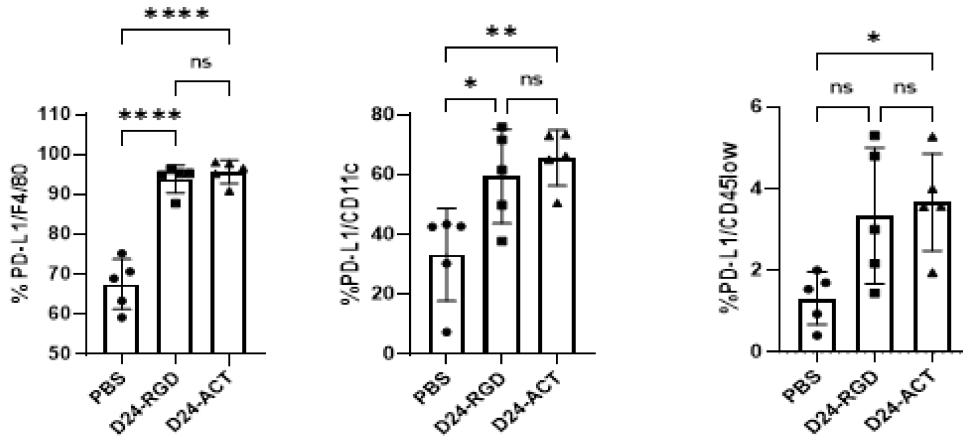

**B**

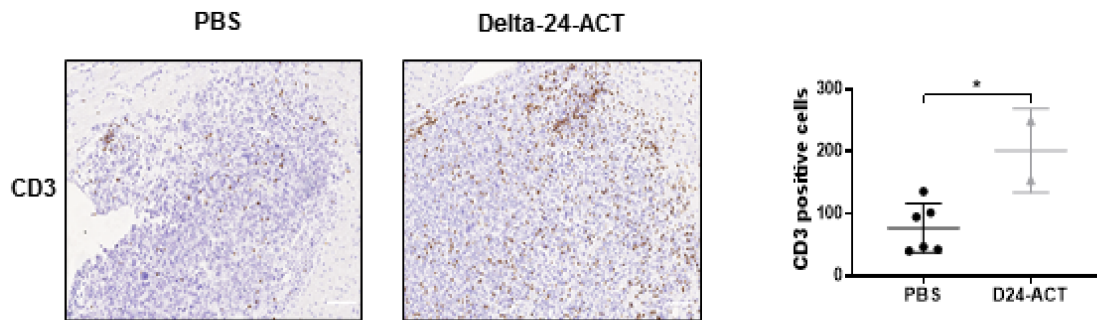

**C**

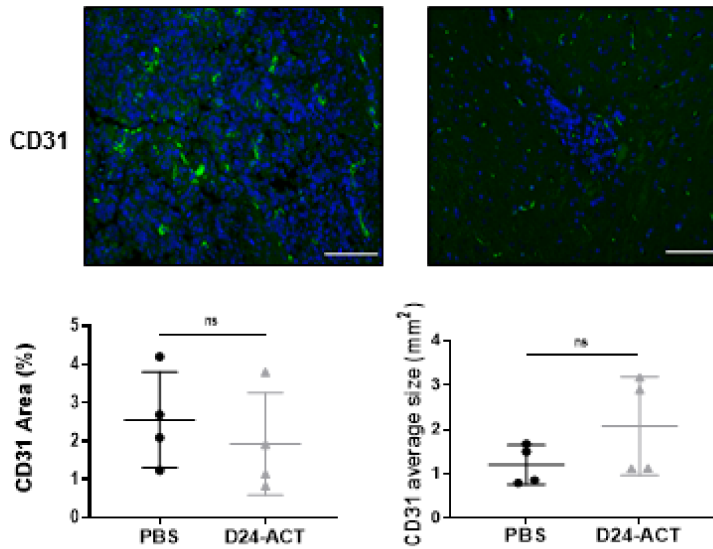

Supplement: jitc-2021-002644supp005_data_supplement.pdf [file jitc-2021-002644supp005_data_supplement.pdf]

### Supplementary Figure 5

**A**

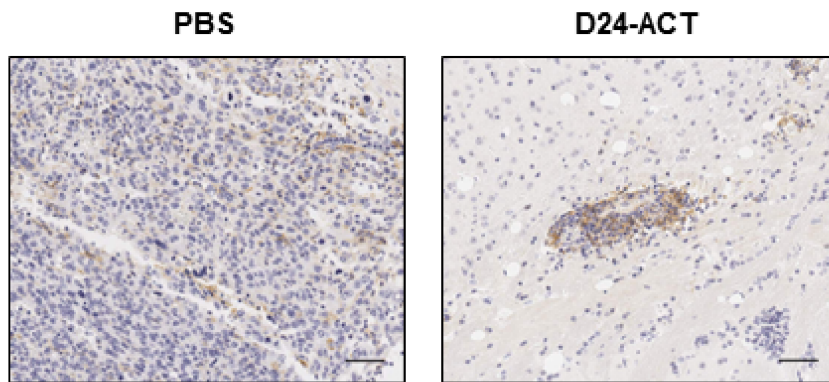

Supplement: jitc-2021-002644supp006_data_supplement.pdf [file jitc-2021-002644supp006_data_supplement.pdf]

**Supplementary Figure 6**

**A**

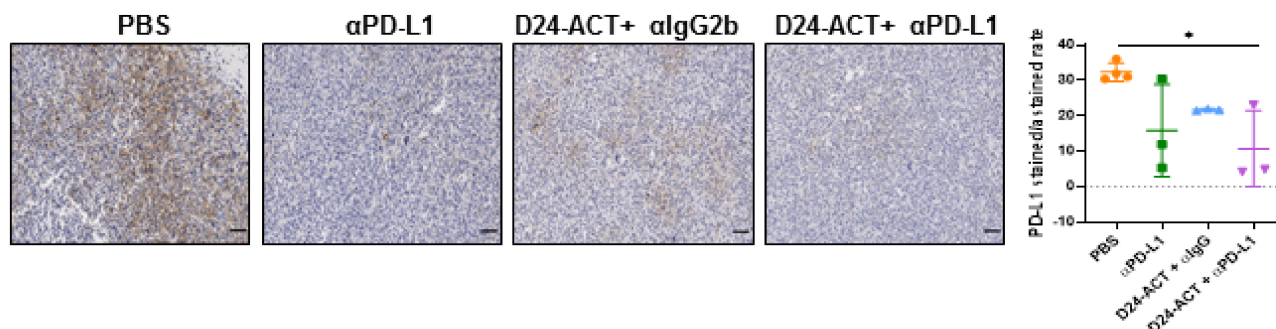

**B**

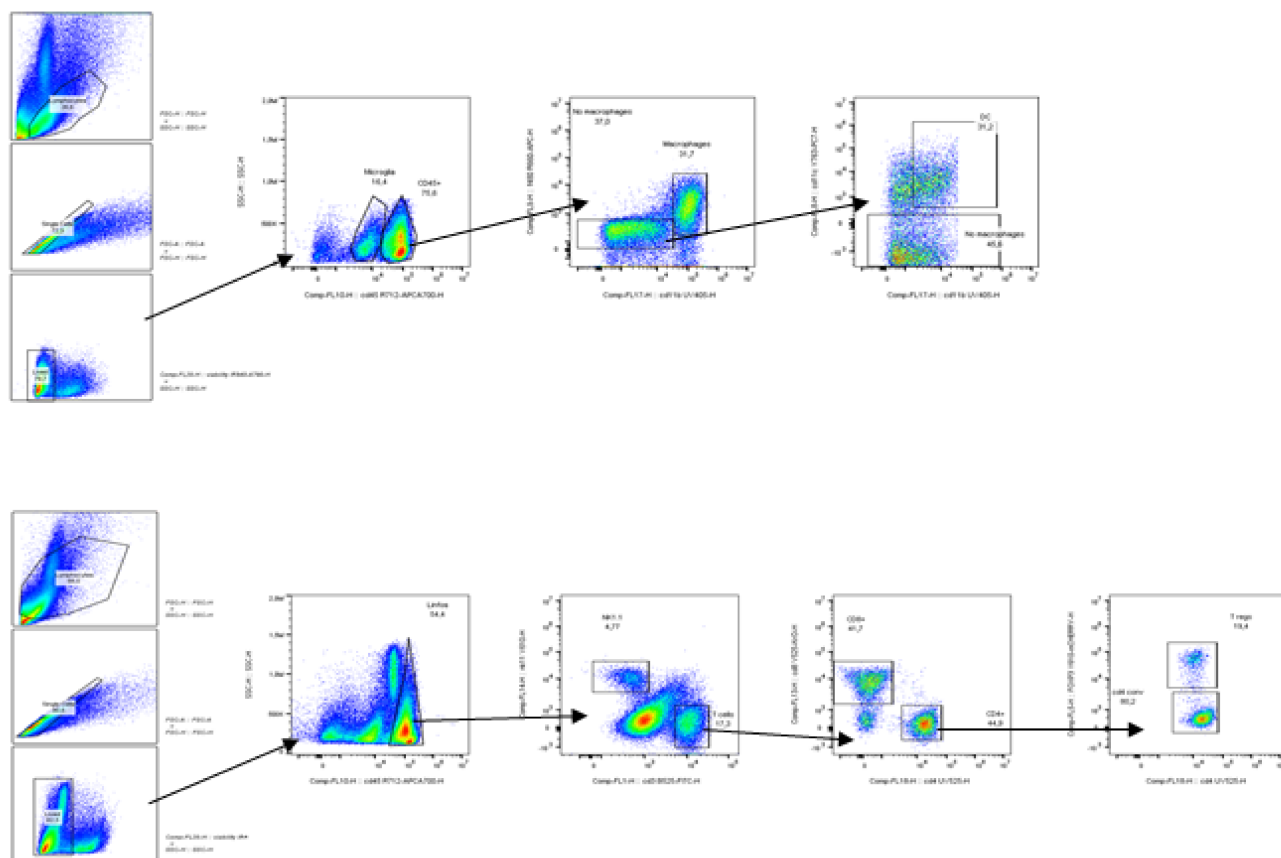

Supplement: jitc-2021-002644supp007_data_supplement.pdf [file jitc-2021-002644supp007_data_supplement.pdf]
